# Supplementary material for: Phosphonate/zwitterionic/cationic terpolymers as high-efficiency bactericidal and antifouling coatings for metallic substrates
Source: Royal Society of Chemistry journal article supplement (doi:10.1039/d1tb00770j), 2021-01-01
Supplement: d1tb00770j1.pdf [file d1tb00770j1.pdf]

## Supporting Information

### **Phosphonate/zwitterionic/cationic terpolymer as high-efficiency bactericidal and antifouling coating for metallic substrates**

Xiao Zhang,<sup>1,§</sup> Li Liu,<sup>1,§</sup> Wan Peng,<sup>1</sup> Xiaohan Dong,<sup>1</sup> Yahui Gu,<sup>1</sup> Zhuangzhuang Ma,<sup>1</sup> Donglin Gan,<sup>1,\*</sup> Pingsheng Liu<sup>1,\*</sup>

<sup>1</sup> Jiangsu Collaborative Innovation Center of Biomedical Functional Materials, Jiangsu Key Laboratory of Bio-functional Materials, School of Chemistry and Materials Science, Nanjing Normal University, Nanjing 210023, P. R. China

<sup>§</sup>These authors contributed equally to this work.

\*Corresponding authors. Email: [07264@njnu.edu.cn](mailto:07264@njnu.edu.cn) (D. G.); [liups@njnu.edu.cn](mailto:liups@njnu.edu.cn) (P. L.)

### **Experimental**

## Preparation of phosphonate/zwitterionic/cationic terpolymers

By calculating the ratio of the integral area of H at position “1” in pDEMMP to the integral area of H in the benzene ring in CTA, the actual DP of pDEMMP was obtained. The peak area of H corresponding to position “5” in pDEMMP-*b*-p(SBMA-*co*-DMAEMA) was taken as reference for normalization calculation, and the ratio of the peak area of H corresponding to -CH<sub>3</sub> at position “2, 7, 12” to the peak area of H corresponding to -N(CH<sub>3</sub>)<sub>2</sub> at position “15” was obtained. Combining with the degree of polymerization of pDEMMP, the actual molar ratio of SBMA to DMAEMA content was obtained.

## Result and Discussion

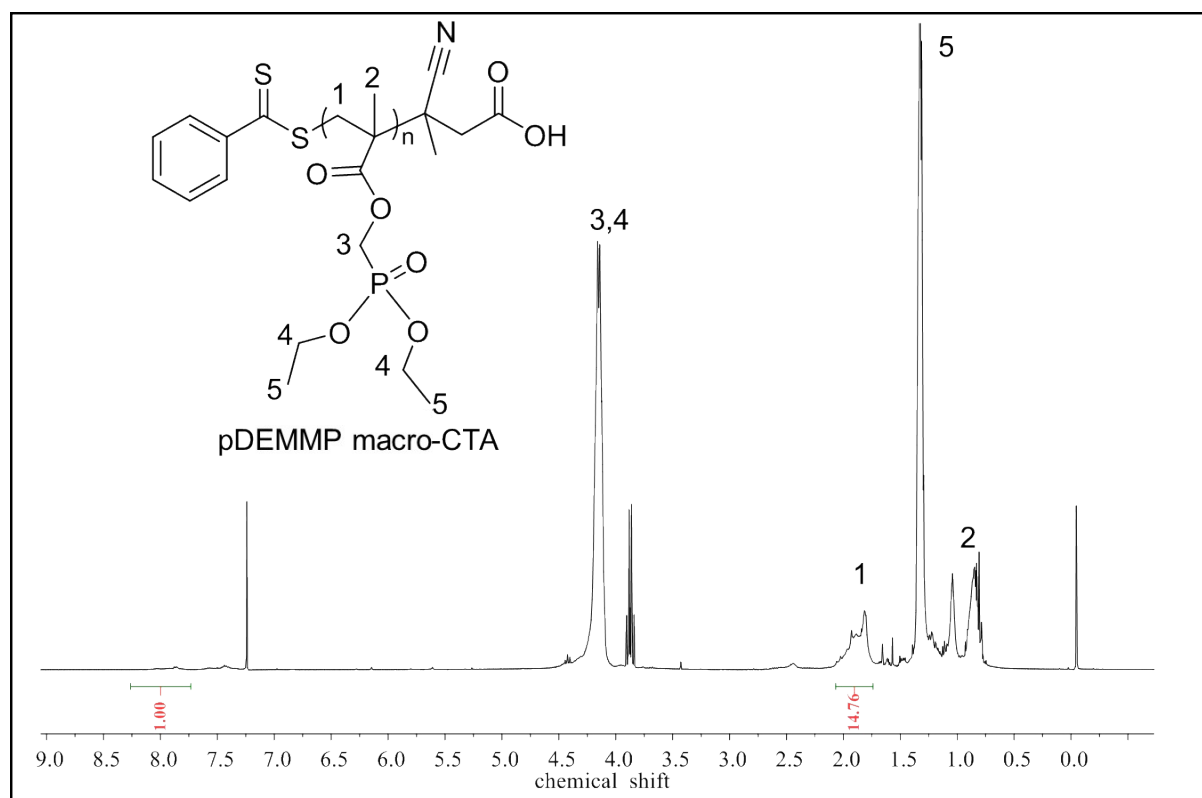

Fig. S1 <sup>1</sup>H NMR spectrum of pDEMMP macro-CTA.

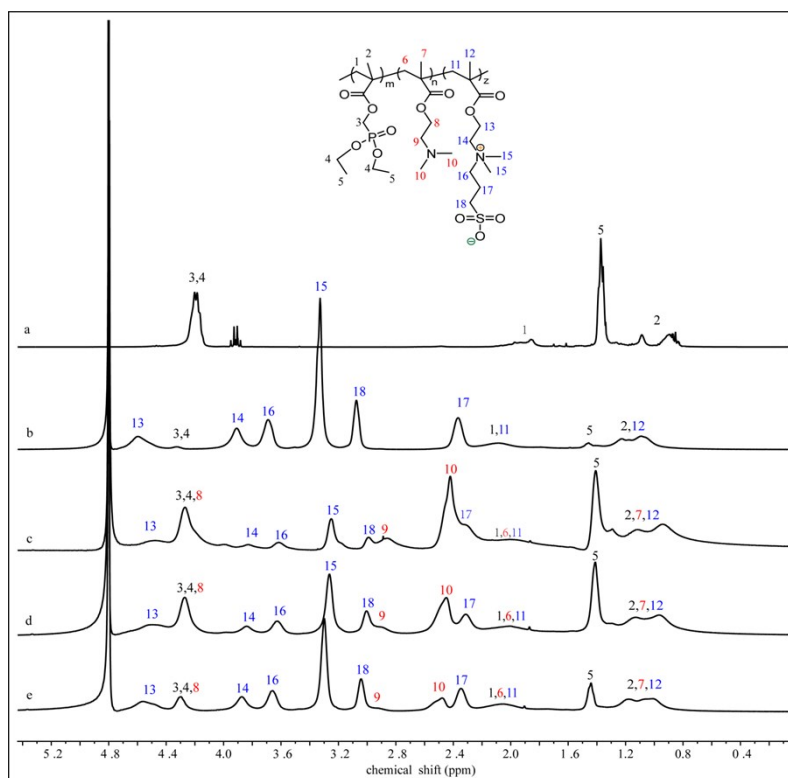

**Fig. S2**  $^1\text{H}$  NMR spectra of pDEMMP, pDEMMP-*b*-pSBMA, and pDEMMP-*b*-p(SBMA-*co*-DMAEMA). (a) pDEMMP, (b) pDEMMP<sub>15</sub>-*b*-pSBMA<sub>64</sub>, (c) pDEMMP<sub>15</sub>-*b*-p(SBMA-*co*-DMAEMA) (54 : 18), (d) pDEMMP<sub>15</sub>-*b*-p(SBMA-*co*-DMAEMA) (18 : 32), and (e) pDEMMP<sub>15</sub>-*b*-p(SBMA-*co*-DMAEMA) (9 : 52).

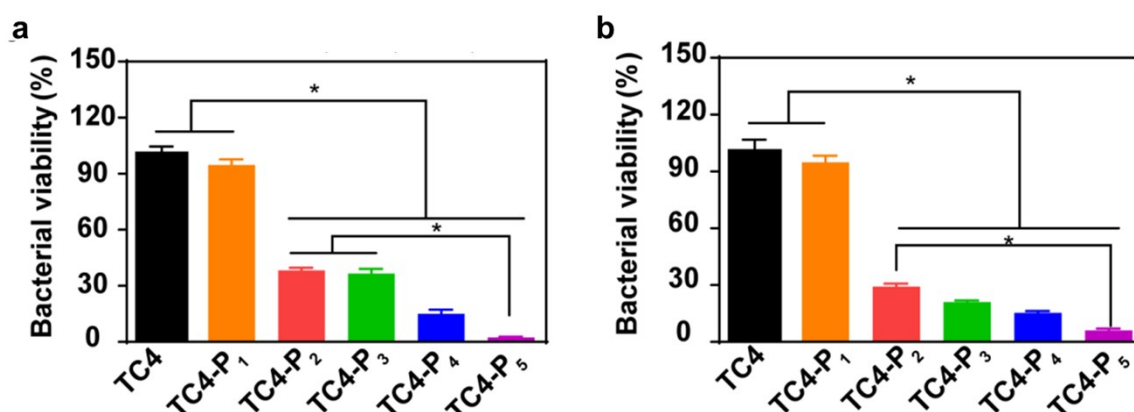

**Fig. S3** Bactericidal properties of various block terpolymers coated surfaces. (a) Antibacterial efficiency of TC4 substrates against *S. aureus*. (b) Antibacterial efficiency of TC4 substrates against *E. coli*. Data are shown as mean  $\pm$  SEM ( $n = 3$ ). Statistical significance was determined by one-way ANOVA multiple comparison. Pairwise comparisons are statistically significant as denoted as \*.

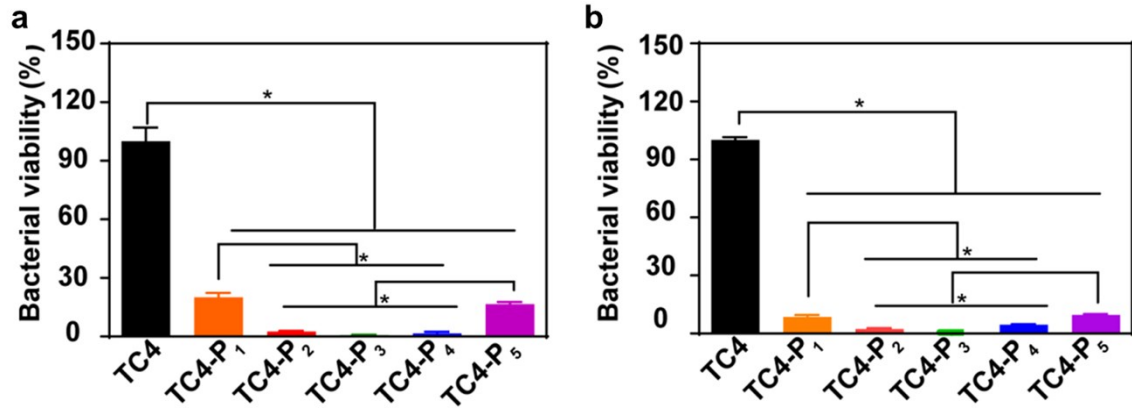

**Fig. S4** Antifouling properties of various block terpolymers coated surfaces. (a) Antibacterial efficiency of TC4 substrates against *S. aureus* after washing with PBS. (b) Antibacterial efficiency of TC4 substrates against *E. coli* after washing with PBS. Data are shown as mean  $\pm$  SEM (n = 3). Statistical significance was determined by one-way ANOVA multiple comparison. Pairwise comparisons are statistically significant as denoted as \*.

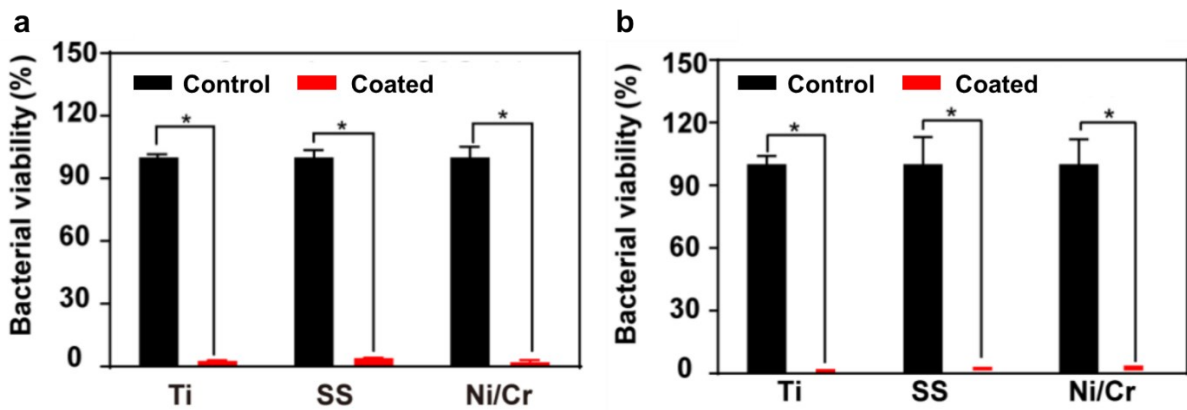

**Fig. S5** Antibacterial and antifouling properties of pure titanium, stainless steel and Ni/Cr alloys coated with block terpolymers. (a) Antibacterial efficiency of titanium, stainless steel and Ni/Cr alloy substrates against *S. aureus*. (b) Antibacterial efficiency of titanium, stainless steel and Ni/Cr alloy substrates against *E. coli*. Data are shown as mean  $\pm$  SEM (n = 3). Statistical significance was determined by two-way ANOVA multiple comparison tests. Pairwise comparisons are statistically significant as denoted as \*.
